# Supplementary material for: Water-soluble phenolic compounds produced from extractive ammonia pretreatment exerted binary inhibitory effects on yeast fermentation using synthetic hydrolysate
Source: PubMed Central journal article supplement (PMC5854342; doi:10.1371/journal.pone.0194012), 2018-03-15
Supplement: pone.0194012.s001.pdf [file pone.0194012.s001.pdf]

**S1 Table. Composition analysis of different fractions of WSC.**

(A). HPLC analysis of sugar and salts concentrations in WSC (g/L);

| HPLC (g/L) | Glucose | Xylose | Arabinose | Lactate | Glycerol | Formate | Acetate | Galactose |
|------------|---------|--------|-----------|---------|----------|---------|---------|-----------|
| WSC        | 2.88    | 1.80   | 0.55      | 0.04    | 1.50     | 0.41    | 1.76    | 0.12      |

(B). HPLC analysis of sugar and salts concentrations in water phase after ethyl acetate extraction (g/L);

| HPLC (g/L)  | Glucose | Arabinose | Lactate | Glycerol | Galactose |
|-------------|---------|-----------|---------|----------|-----------|
| Water phase | 0.44    | 1.10      | 0.12    | 0.64     | 0.14      |

(C). Free amino acids analysis of WSC ( $\mu\text{g}/\mu\text{L}$ );

|            |            |            |            |            |
|------------|------------|------------|------------|------------|
| <b>Asp</b> | Asn        | <b>Thr</b> | <b>Ser</b> | <b>Glu</b> |
| 1.49E+02   | 0.00E+00   | 1.05E+02   | 1.66E+02   | 5.80E+01   |
| <b>Ile</b> | <b>Leu</b> | <b>Tyr</b> | <b>Phe</b> | His        |
| 9.39E+01   | 9.00E+01   | 8.12E+01   | 9.79E+01   | 0.00E+00   |
| <b>Gln</b> | <b>Pro</b> | <b>Gly</b> | <b>Ala</b> | Val        |
| 1.90E+02   | 3.36E+02   | 1.75E+02   | 6.05E+02   | 0.00E+00   |
| <b>Lys</b> | Arg        | Cystine    | Methionine | Tryptophan |
| 4.97E+01   | 0.00E+00   | 0.00E+00   | 0.00E+00   | 0.00E+00   |

(D). Mineral salts (heavy metal) analysis of WSC (ppm)

|              |                |           |           |           |           |        |           |            |
|--------------|----------------|-----------|-----------|-----------|-----------|--------|-----------|------------|
| <b>P</b>     | <b>K</b>       | <b>Ca</b> | <b>Mg</b> | <b>S</b>  | <b>Zn</b> | B      | <b>Mn</b> | <b>Fe</b>  |
| 23.5         | 1013.7         | 20.4      | 110       | 105.6     | 0.73      | < 0.04 | 1.4       | 0.1        |
| <b>Cu</b>    | <b>Al</b>      | <b>Na</b> | Cd        | <b>Co</b> | Cr        | Mo     | Ni        | Pb         |
| 0.28         | 0.14           | 9.4       | <0.008    | 0.01      | <0.002    | 0.01   | 0.02      | <0.04      |
| <b>NH4-N</b> | <b>Total N</b> | <b>Cl</b> | <b>F</b>  | NO2       | Br        | NO3    | PO4       | <b>SO4</b> |
| 1624         | 5509           | 596.4     | 1148.5    | <0.01     | <0.01     | <0.01  | <0.02     | 348.7      |
