# Supplementary material for: Water-soluble phenolic compounds produced from extractive ammonia pretreatment exerted binary inhibitory effects on yeast fermentation using synthetic hydrolysate
Source: PubMed Central journal article supplement (PMC5854342; doi:10.1371/journal.pone.0194012), 2018-03-15
Supplement: pone.0194012.s002.pdf [file pone.0194012.s002.pdf]

**S2 Table. Recipe of SynH being used for fermentation study.**

(A). Phosphate buffer,  $(\text{NH}_4)_2\text{SO}_4$  and salts (K/Na/Ca/Mg), amino acids, nucleic base, Vitamin;

| <b>Component</b>                          | <b>mM (Final Concn.)</b> |
|-------------------------------------------|--------------------------|
| $\text{KH}_2\text{PO}_4$                  | 5.84                     |
| $\text{K}_2\text{HPO}_4$                  | 11.15                    |
| $(\text{NH}_4)_2\text{SO}_4$              | 30                       |
| KCl                                       | 36.8                     |
| NaCl                                      | 1.3                      |
| $\text{CaCl}_2 \cdot 2\text{H}_2\text{O}$ | 5.5                      |
| $\text{MgCl}_2 \cdot 6\text{H}_2\text{O}$ | 12.5                     |
| L-Alanine                                 | 1.172                    |
| L-Arginine.HCl                            | 0.144                    |
| L-Asparagine                              | 0.228                    |
| DL-Aspartic acid.K                        | 0.594                    |
| L-Cysteine.HCl                            | 0.050                    |
| L-glutamine                               | 0.259                    |
| L-Glutamic acid.K                         | 0.607                    |
| Glycine                                   | 0.378                    |
| L-Histidine                               | 0.037                    |
| L-Isoleucine                              | 0.262                    |
| L-Leucine                                 | 0.371                    |
| L-Lysine.HCl                              | 0.175                    |
| L-Methionine                              | 0.100                    |
| L-Phenylalanine                           | 0.282                    |
| L-Proline                                 | 0.656                    |
| L-Serine                                  | 0.369                    |
| L-Threonine                               | 0.310                    |
| L-Tryptophan                              | 0.050                    |
| L-Valine                                  | 0.424                    |
| L-Tyrosine                                | 0.202                    |
| Adenine                                   | 0.05                     |
| Cytosine                                  | 0.05                     |
| Uracil                                    | 0.05                     |
| Guanine                                   | 0.05                     |
| Thiamine HCl                              | 0.0004                   |
| Calcium Pantothenate                      | 0.003                    |

(B). Micro nutrients, FNSG salts, osmoprotectants, acetic and lactic degradation products, carbohydrates (carbon sources), Pyridines

| <b>Component</b>                                                                | <b>mM (Final Concn.)</b> |
|---------------------------------------------------------------------------------|--------------------------|
| <b>ZnCl<sub>2</sub></b>                                                         | <b>20</b>                |
| <b>MnCl<sub>2</sub>·4H<sub>2</sub>O</b>                                         | <b>91</b>                |
| <b>CuCl<sub>2</sub>·2H<sub>2</sub>O</b>                                         | <b>1.9</b>               |
| <b>CoCl<sub>2</sub>·6H<sub>2</sub>O</b>                                         | <b>0.03</b>              |
| <b>H<sub>3</sub>BO<sub>4</sub></b>                                              | <b>23.1</b>              |
| <b>(NH<sub>3</sub>)<sub>6</sub>Mo<sub>7</sub>O<sub>24</sub>·4H<sub>2</sub>O</b> | <b>0.31</b>              |
| <b>FeCl<sub>3</sub>·6H<sub>2</sub>O</b>                                         | <b>20</b>                |
| <b>Sodium formate</b>                                                           | <b>2.8</b>               |
| <b>Sodium nitrate</b>                                                           | <b>1.1</b>               |
| <b>Sodium succinate</b>                                                         | <b>0.5</b>               |
| <b>Glycerol</b>                                                                 | <b>4.1</b>               |
| <b>Betaine.H<sub>2</sub>O</b>                                                   | <b>0.7</b>               |
| <b>Choline Chloride</b>                                                         | <b>0.3</b>               |
| <b>DL-Carnitine</b>                                                             | <b>0.3</b>               |
| <b>Acetamide</b>                                                                | <b>80</b>                |
| <b>Sodium acetate</b>                                                           | <b>32</b>                |
| <b>L-lactatic acid (90%)</b>                                                    | <b>4</b>                 |
| <b>D-Mannose</b>                                                                | <b>1.2</b>               |
| <b>L-Arabinose</b>                                                              | <b>20</b>                |
| <b>D-Fructose</b>                                                               | <b>24</b>                |
| <b>D-Galactose</b>                                                              | <b>2.9</b>               |
| <b>D-Glucose</b>                                                                | <b>30 g/L (333 mM)</b>   |
| <b>D(+)-Xylose</b>                                                              | <b>30 g/L (200 mM)</b>   |
| <b>Pyridoxine.HCl</b>                                                           | <b>2.14 μM</b>           |
| <b>Nicotinic Acid</b>                                                           | <b>26.78 μM</b>          |
| <b>Biotin</b>                                                                   | <b>0.1 μM</b>            |
| <b>Inositol</b>                                                                 | <b>0.056 mM</b>          |
