# Supplementary material for: Water-soluble phenolic compounds produced from extractive ammonia pretreatment exerted binary inhibitory effects on yeast fermentation using synthetic hydrolysate
Source: PubMed Central journal article supplement (PMC5854342; doi:10.1371/journal.pone.0194012), 2018-03-15
Supplement: pone.0194012.s003.pdf [file pone.0194012.s003.pdf]

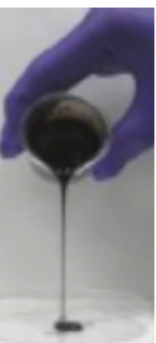

Water extraction

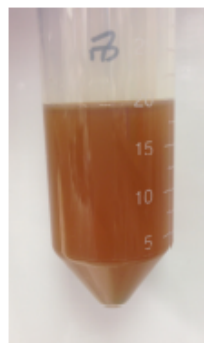

pH adjustment (pH=3)

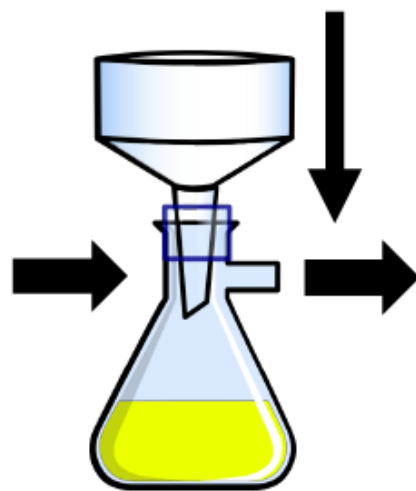

Centrifugation and filtration

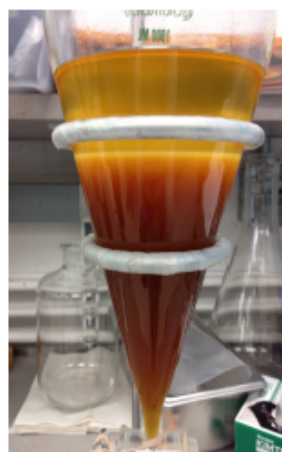

Liquid-liquid Extraction (ethyl acetate-water)

Phase separation

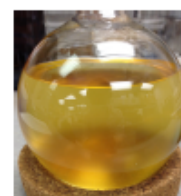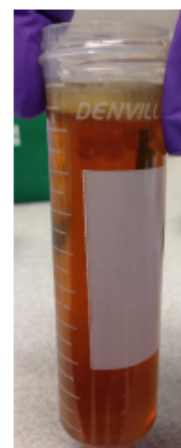

Rota-evaporation

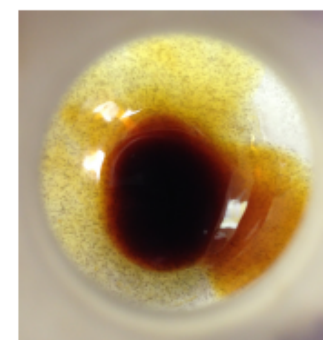

Phenolic compounds
